# Supplementary material
Source: PubMed Central journal article supplement (PMC4276485)

## Supplemental Digital Content 1

Supplemental Figure 1. Study Flow Chart (during the treatment phase n value indicates the number of subjects for whom drinking data was available).

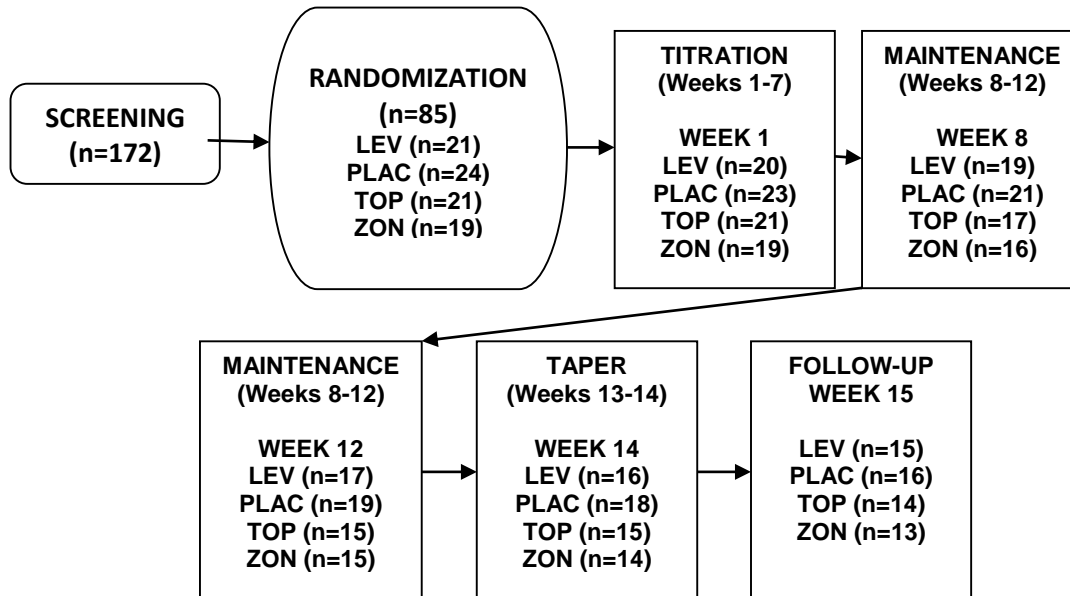

Supplement: NIHMS633409-supplement-Supplemental_Figure_1.pdf [file NIHMS633409-supplement-Supplemental_Figure_1.pdf]
